# Supplementary figures and images for: Improving the Peri-operative care of Patients by instituting a ‘Block Room’ for Regional Anaesthesia
Source: PubMed Central journal article supplement — BMJ Qual Improv Rep. 2014 May 2;3(1):u204061.w1769. doi: 10.1136/bmjquality.u204061.w1769 (PMC4645799; doi:10.1136/bmjquality.u204061.w1769), 2014-05-02

### BLOCK TYPE

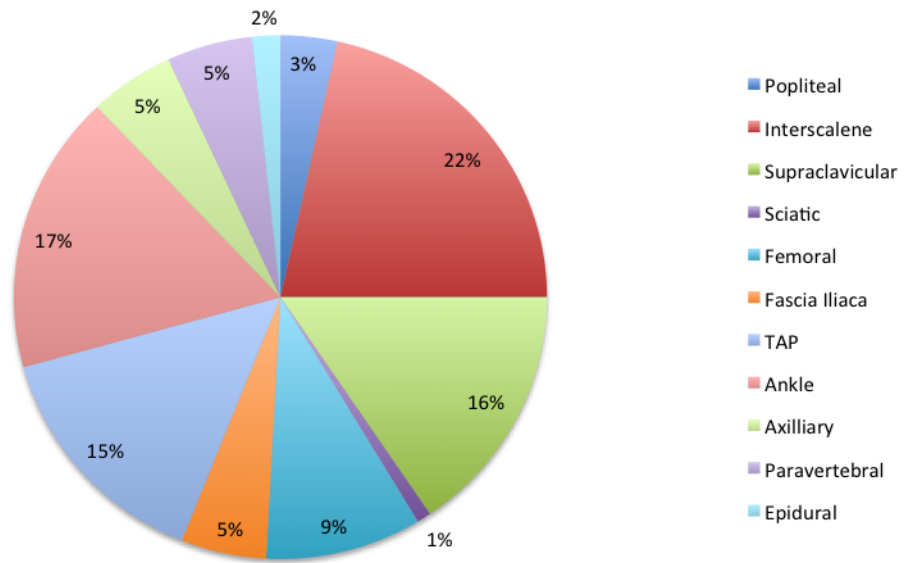

Supplement: bmjqir-3-u204061-w1769-s1.pdf [file bmjqir-3-u204061-w1769-s1.pdf]
